# Supplementary material for: Age‐associated vascular inflammation promotes monocytosis during atherogenesis
Source: PubMed Central journal article supplement (PMC4933655; doi:10.1111/acel.12488), 2016-05-02
Supplement: ACEL-15-766-s009.pdf [file ACEL-15-766-s009.pdf]

## Rebuttal Figures a and b

*For review purposes only*

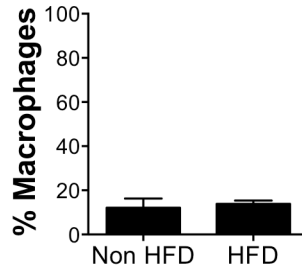

**Rebuttal Figure a** *WT aged mice do not accumulate macrophages in the aorta during HFD.* Aged wild type mice were fed a HFD for 1 month or left on a chow diet. At this point, aortas were harvested, digested to yield a cellular suspension. The cells were stained for macrophages (CD11b<sup>+</sup> F4/80<sup>+</sup>) and the proportion of total cells in either group was assessed by flow cytometry. N = 3 / group.

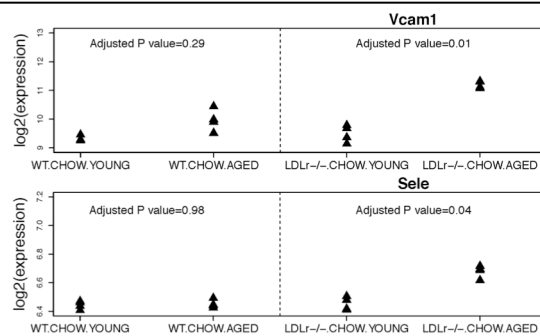

**Rebuttal Figure b** Analysis of microarray data for the expression of VCAM-1 and E-selectin in WT and *Ldlr*<sup>-/-</sup> young and aged mice maintained on a chow diet. Adjusted p values (q values) are shown with a FDR cut off at <0.05. N = 4 biological replicates / group.
